# Supplementary material for: Clostridium perfringens α-toxin impairs erythropoiesis by inhibition of erythroid differentiation
Source: PubMed Central journal article supplement (PMC5507896; doi:10.1038/s41598-017-05567-8), 2017-07-12
Supplement: 41598_2017_5567_MOESM1_ESM.pdf [file 41598_2017_5567_MOESM1_ESM.pdf]

***Clostridium perfringens*  $\alpha$ -toxin impairs erythropoiesis by inhibition of  
erythroid differentiation**

Teruhisa Takagishi<sup>a</sup>, Masaya Takehara<sup>a,\*</sup>, Soshi Seike, Kazuaki Miyamoto, Keiko

Kobayashi, Masahiro Nagahama\*

Department of Microbiology, Faculty of Pharmaceutical Sciences, Tokushima Bunri  
University, Yamashiro-cho, Tokushima 770-8514, Japan

\*To whom correspondence should be addressed: Dr. Masaya Takehara and Dr.

Masahiro Nagahama, Department of Microbiology, Faculty of Pharmaceutical Sciences,

Tokushima Bunri University, Yamashiro-cho, Tokushima 770-8514, Japan; E-mail:

[mtakehara@ph.bunri-u.ac.jp](mailto:mtakehara@ph.bunri-u.ac.jp) and [nagahama@ph.bunri-u.ac.jp](mailto:nagahama@ph.bunri-u.ac.jp); Tel.: +81-88-602-8485,

Fax: +81-88-655-3051.

<sup>a</sup>These authors contributed equally to this work.

## **Table of Contents**

Supplementary Figures S1 and S2

Supplementary Methods

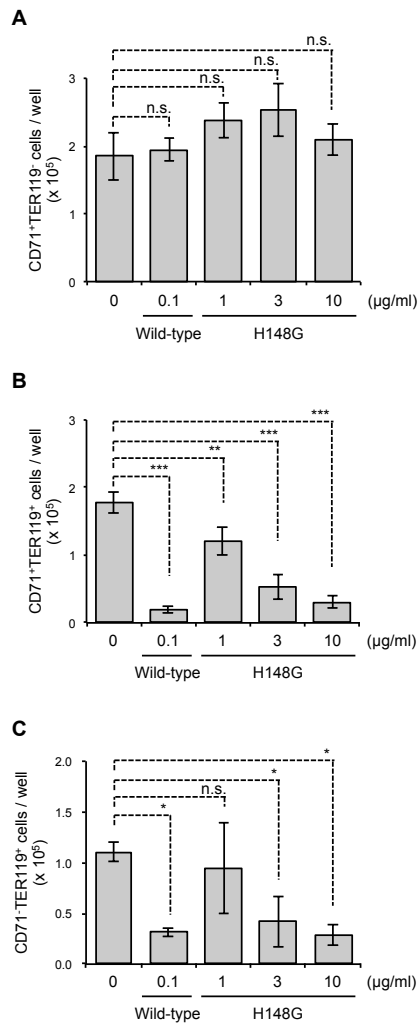

**Figure S1. Treatment of BMCs with high-dose H148G variant  $\alpha$ -toxin decreases mature erythroblasts.** A total of  $5 \times 10^6$  bone marrow cells were cultured for 24 hours in the presence of the indicated concentration of  $\alpha$ -toxin (Wild-type) or a variant  $\alpha$ -toxin (H148G), and flow cytometry analysis was performed using a Guava easyCyte. The absolute number of CD71<sup>+</sup>TER119<sup>-</sup> (A), CD71<sup>+</sup>TER119<sup>+</sup> (B), and CD71<sup>-</sup>TER119<sup>+</sup> cells (C) per culture well was determined.

One-way ANOVA was employed to assess statistical significance. Values are mean  $\pm$  standard deviation. \* $P < 0.05$ ; \*\* $P < 0.01$ ; \*\*\* $P < 0.001$ ; n.s., not significant.

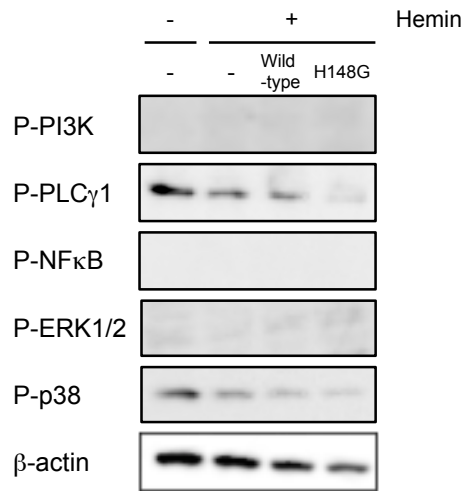

**Figure S2. Phosphorylation of signaling molecules already known to be activated by  $\alpha$ -toxin.** K562 cells were cultured in the presence of 30  $\mu$ M hemin. Simultaneously, the cells were treated with 100 ng/ml  $\alpha$ -toxin (Wild-type) or a variant  $\alpha$ -toxin, H148G (H148G) for 3 days. Whole cell extracts from the cells were analyzed by immunoblotting with phospho-specific antibodies against PI3K (P-PI3K), PLC $\gamma$ 1 (P-PLC $\gamma$ 1), NF- $\kappa$ B (P-NF $\kappa$ B), ERK 1/2 (P-ERK1/2) or p38 MAPK (P-p38), or a specific antibody against  $\beta$ -actin ( $\beta$ -actin).

## Supplementary Methods

**Reagents.** Phospho-specific antibodies against PI3K, PLC $\gamma$ 1, NF- $\kappa$ B, ERK 1/2, and p38 MAPK were from Cell Signaling Technology. An antibody against  $\beta$ -actin was purchased from Santa Cruz Biotechnology.

**Immunoblotting analysis.** Immunoblotting analysis was performed as previously described with some modifications<sup>55</sup>. Briefly, cells were lysed in RIPA buffer (Nacalai Tesque). The protein concentrations of the samples were determined using a BCA protein assay kit (Nacalai Tesque). Samples were applied to 10% polyacrylamide gels containing SDS, subjected to electrophoresis, and transferred to a polyvinylidene difluoride membrane (PVDF, Immobilon P; Millipore). The membrane was blocked with Blocking One-P (Nacalai Tesque), and the proteins were then immunoblotted with each antibody.

## Reference

- 55 Seike, S., Takehara, M., Kobayashi, K. & Nagahama, M. Role of pannexin 1 in *Clostridium perfringens* beta-toxin-caused cell death. *Biochim Biophys Acta* **1858**, 3150-3156 (2016)
